# Supplementary material for: Molecular characterization of renal cell carcinoma tumors from a phase III anti-angiogenic adjuvant therapy trial
Source: PubMed Central journal article supplement (PMC9550765; doi:10.1038/s41467-022-33555-8), 2022-10-10
Supplement: 41467_2022_33555_MOESM1_ESM.pdf [file 41467_2022_33555_MOESM1_ESM.pdf]

**Supplementary Table 1** Patient demographics and baseline characteristics.

| Variables, n (%)                | WES Population    |                 |         | GES Population    |                 |         |
|---------------------------------|-------------------|-----------------|---------|-------------------|-----------------|---------|
|                                 | Sunitinib<br>n=91 | Placebo<br>n=80 | P-value | Sunitinib<br>n=72 | Placebo<br>n=61 | P-value |
| Age, years                      |                   |                 |         |                   |                 |         |
| <65                             | 67 (73.6)         | 52 (65.0)       | 0.2461  | 53 (73.6)         | 43 (70.5)       | 0.7025  |
| ≥65                             | 24 (26.4)         | 28 (35.0)       |         | 19 (26.4)         | 18 (29.5)       |         |
| Race                            |                   |                 |         |                   |                 |         |
| White                           | 76 (83.5)         | 70 (87.5)       | 0.3160  | 58 (80.6)         | 53 (86.9)       | 0.3002  |
| Black                           | 0                 | 1 (1.3)         |         | 0                 | 1 (1.6)         |         |
| Asian                           | 13 (14.3)         | 6 (7.5)         |         | 12 (16.7)         | 5 (8.2)         |         |
| Other                           | 2 (2.2)           | 3 (3.8)         |         | 2 (2.8)           | 2 (3.3)         |         |
| ECOG PS                         |                   |                 |         |                   |                 |         |
| 0                               | 65 (71.4)         | 59 (73.8)       | 1.000   | 50 (69.4)         | 40 (65.6)       | 0.8497  |
| 1                               | 24 (26.4)         | 21 (26.3)       |         | 20 (27.8)         | 20 (32.8)       |         |
| 2                               | 1 (1.1)           | 0               |         | 1 (1.4)           | 0               |         |
| NR                              | 1 (1.1)           | 0               |         | 1 (1.4)           | 1 (1.6)         |         |
| UISS high-risk group            |                   |                 |         |                   |                 |         |
| T3 low <sup>a</sup>             | 28 (30.8)         | 25 (31.3)       | 0.9623  | 22 (30.6)         | 20 (32.8)       | 0.3884  |
| T3 high <sup>b</sup>            | 56 (61.5)         | 48 (60.0)       |         | 47 (65.3)         | 36 (59.0)       |         |
| T4 N0 or NX,<br>M0 <sup>c</sup> | 2 (2.2)           | 1 (1.3)         |         | 1 (1.4)           | 0               |         |
| Any T, N1-2,<br>M0 <sup>c</sup> | 5 (5.5)           | 6 (7.5)         |         | 2 (2.8)           | 5 (8.2)         |         |

<sup>a</sup> N0 or NX, M0, any Fuhrman's grade and ECOG PS 0 or T3 N0 or NX, M0, Fuhrman's grade 1 and ECOG PS ≥1.

<sup>b</sup> N0 or NX, M0, Fuhrman's grade ≥2 and ECOG PS ≥1.

<sup>c</sup> Any Fuhrman's grade and any ECOG PS.

Race, height, and weight were recorded at each site during screening. Race was investigator-reported in the study Clinical Research Form.

A two-sided log-rank test was used to obtain the P-values; no adjustments were made for multiple comparisons

ECOG PS=Eastern Cooperative Oncology Group performance status; GES=gene expression signatures; M=metastasis; N=node; NR=not reported;

NX=nearby lymph nodes cannot be assessed due to lack of information; T=tumor; UISS=University of California-Los Angeles Integrated Staging

System; WES=whole exome signatures

**Supplementary Table 2** Complete listing of each institutional review board or independent ethics committee, listed by country

---

**Czech Republic**

Multicentricka eticka komise Fakultni nemocnice Motol  
V Uvalu 84  
Praha 5, CZECH REPUBLIC 150 06

---

**France**

Centre Hospitalier Universitaire Pontchaillou  
Comite de protection des personnes "Ouest V"  
Pavillon Clemenceau  
Rennes cedex, FRANCE 35033

---

**Germany**

Ethik-Kommission der Medizinischen Fakultät der Ludwig-Maximilians Universität München  
Pettenkoferstr. 8a  
München, GERMANY 80336

---

**Greece**

National Ethics Committee  
284 Mesogeion Avenue Cholargos  
Athens, ATTIKI GREECE 15562

---

**Ireland**

SJH/AMNCH Research Ethic Committee  
FDVH Annex Adelaide and Meath Hospital Tallaght  
Dublin, IRELAND 24

---

**Italy**

Comitato Etico A.O.R.N. A. Cardarelli A.O.R.N. Santobono-Pausilipon  
Via Antonio Cardarelli, 9  
Napoli, ITALY 80131

---

Comitato Etico Centrale IRCCS Lombardia,  
Fondazione IRCCS Istituto Nazionale dei Tumori di Milano  
Via Venezian, 1  
Milano, ITALY 20133

---

Comitato Etico Delle provincie di Chieti e Pescara ASL di Lanciano -Vasto- Chieti  
Via dei Vestini 29B  
Chieti Scalo, ITALY 66013

---

Comitato Etico Indipendente dell'Azienda Ospedaliero Universitaria,  
Policlinico Sant' Orsola  
Padiglione 3 Via Albertoni, 15Malpighi di Bologna  
Bologna, ITALY 40138

---

Comitato Etico Val Padana  
Viale Concordia, 1  
Cremona, ITALY 26100

---

**Poland**

Komisja Bioetyczna Wojskowego Instytutu Medycznego  
ul. Szaserow 128  
Warszawa, POLAND 04-141

---

**Slovakia**

Fakultna nemocnica s poliklinikou  
Eticka komisia  
Vojtecha Spanyola 43  
Zilina, SLOVAKIA 012 07

---

Eticka komisia, Univerzitna nemocnica Bratislava  
Pracovisko: Nemocnica akademika L. Derera Limbova 5  
Bratislava, SLOVAKIA 833 05

---

**Spain**

Comite Etico de Investigacion Clinica  
Hospital Clinico i Provincial de Barcelona  
C/ VILLARROEL, 170  
BARCELONA, BARCELONA SPAIN 8036

---

**Switzerland**

Kantonale Ethikkommission Bern (KEK)  
Postfach 56  
Bern, SWITZERLAND 3010

---

**Taiwan**

Institutional Review Board of Taipei Veterans General Hospital  
201, Sec. 2. Shih-Pai Road  
Taipei, TAIWAN 112

---

**United States**

The University of North Carolina at Chapel Hill  
Medical School Bldg 52 105 Mason Farm Road  
Office of Human Research Ethics CB 7097  
Chapel Hill, NC UNITED STATES 27599-7097

---

Western Institutional Review Board  
3535 Seventh Ave SW  
Olympia, WA UNITED STATES 98502

---

**Supplementary Fig. 1** Complete profile of cell types significantly associated with DFS . Longer DFS (red), shorter DFS (blue), and non-significant (white) are shown. Each cell type score (xCell) was stratified by >median or ≤median for the overall cohort, sunitinib arm, or placebo arm. The log<sub>2</sub>(HR) was clustered in a heatmap.

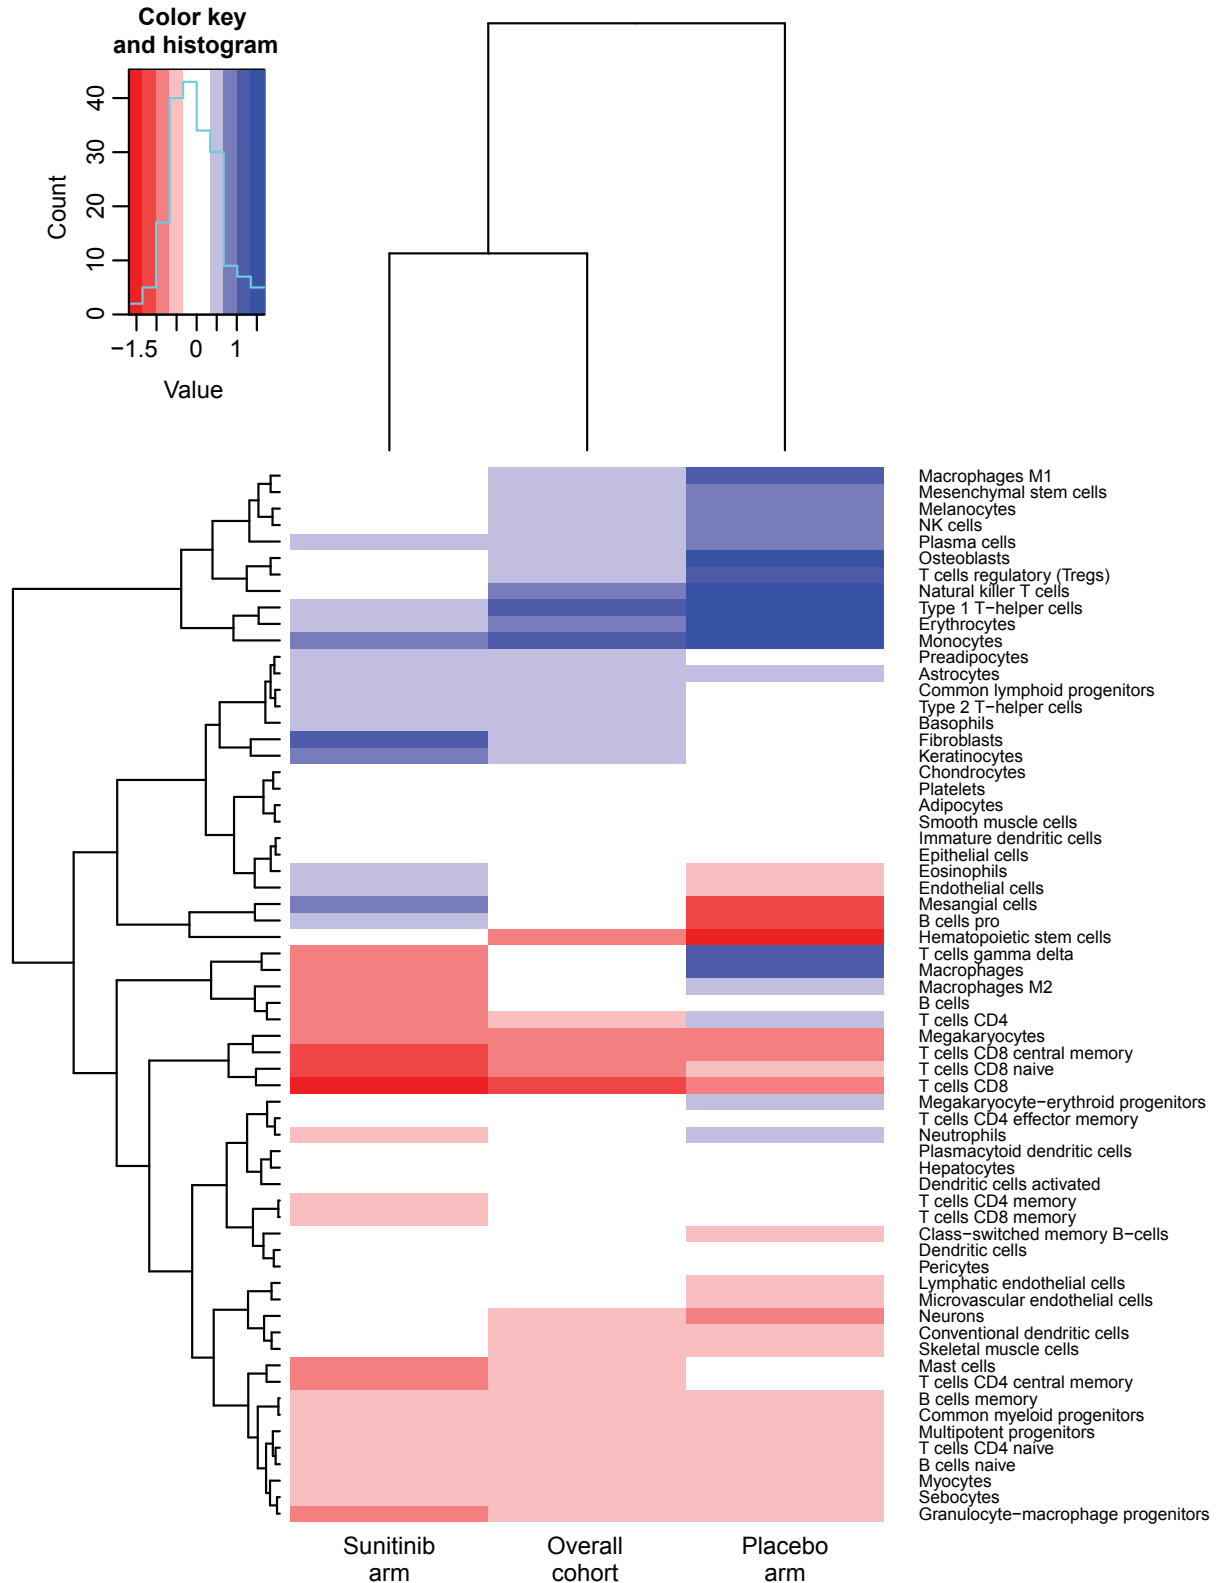

DFS=disease-free survival; HR=hazard ratio. For significant and non-significant cell types for both arms and overall cohort, data are available in raw data file FigureS1\_cell\_types\_assoc\_with\_DFS/data.tsv

**Supplementary Fig. 2** Identification of new transcriptomic STRAC14 signature associated with high risk of recurrence and poor prognosis.

(a) Discovery of the STRAC14 GES according to bootstrapping frequency [derived from the placebo-treated S-TRAC trial population]. Kaplan–Meier plot of (b) differential DFS probability by STRAC14 in the S-TRAC overall population and (c) by treatment arm. Kaplan-Meier plot of (d) differential PFS probability, and (e) and differential OS probability by STRAC14 in TCGA data set and differential PFS probability by STRAC14 in the JAVELIN Renal 101 (f) overall data set and (g) by treatment arm. For panels 2b-g, a two-sided log-rank test was used and no adjustments were made for multiple comparisons.

**a STRAC14 GES**

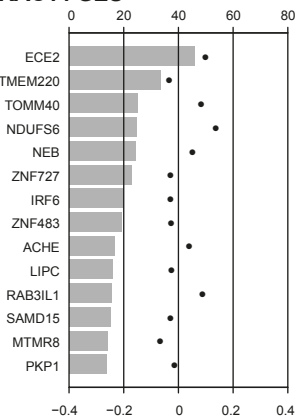

**b STRAC14 S-TRAC overall population**

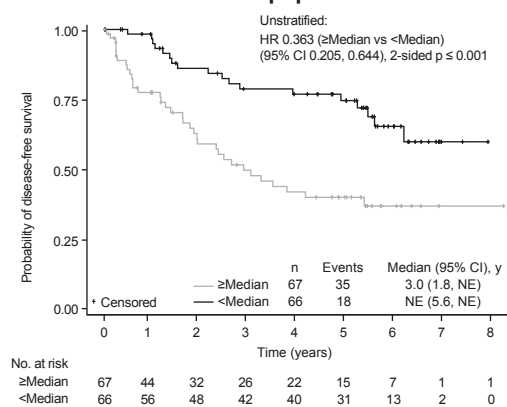

**c STRAC14 S-TRAC placebo cohort**

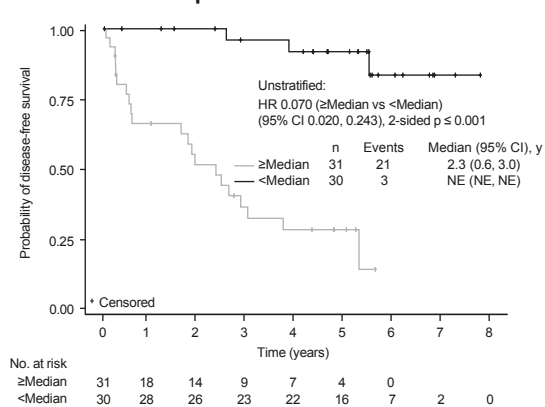

**d STRAC14 TCGA KIRC**

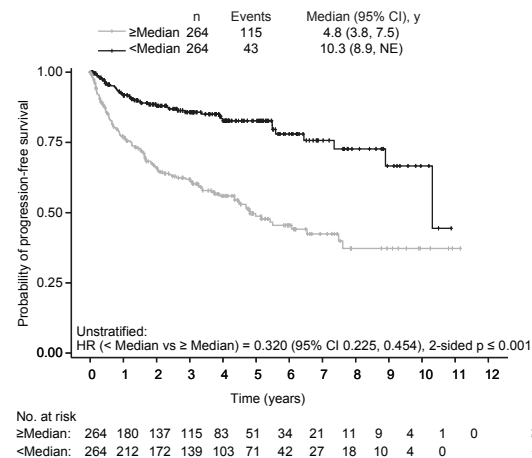

**e STRAC14 TCGA KIRC**

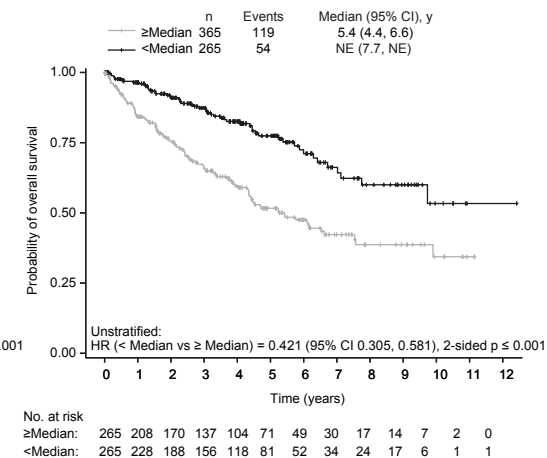

**f STRAC14 JAVELIN overall population**

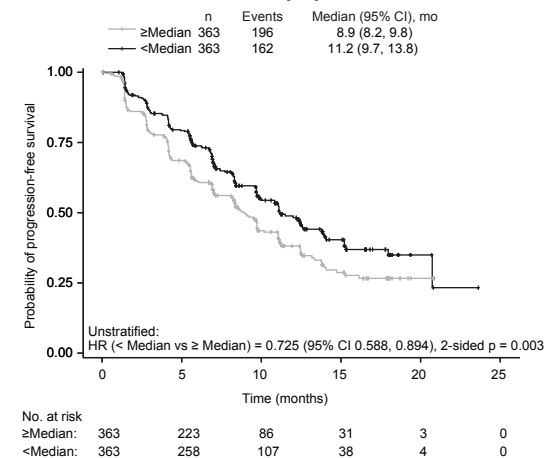

**g STRAC14 JAVELIN treatment cohorts**

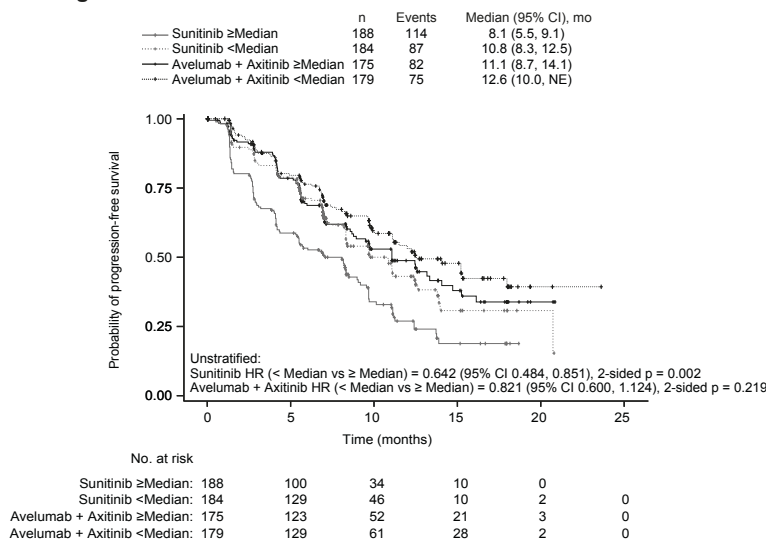

ACHE=acetylcholinesterase; CI=confidence interval; DFS=disease-free survival; ECE2=endothelin converting enzyme 2; HR=hazard ratio; IRF6= interferon regulatory factor 6; LIPC=lipase C (hepatic type); MTMR8=myotubularin related protein 8; NE=not estimable; NEB=nebulin; NDUFS6= NADH:ubiquinone oxidoreductase subunit S6; OS=overall survival; PFS=progression-free survival; PKP1=plakophilin 1; RAB31L1=RAB3A interacting protein like 1; SAMD15=sterile alpha motif domain containing 15; STRAC14=gene expression signature of 14 genes; TCGA KIRC=The Cancer Genome Atlas Kidney Renal Clear Cell Carcinoma; TMEM220=transmembrane protein 220; TOMM40=translocase of outer mitochondrial membrane 40; ZNF483=zinc finger protein 483; ZNF727=zinc finger protein 727

**Supplementary Fig. 3** Identification of new transcriptomic STRAC13 signature associated with high risk of recurrence and poor prognosis.

(a) Discovery of the STRAC13 GES according to bootstrapping frequency [derived from entire S-TRAC trial population]. Kaplan–Meier plot of (b) differential DFS probability by STRAC13 in the S-TRAC overall population and (c) by treatment arm. Kaplan-Meier plot of (d) differential PFS probability, and (e) and differential OS probability by STRAC13 in TCGA data set and differential PFS probability by STRAC13 in the JAVELIN Renal 101 (f) overall data set and (g) by treatment arm. For panels 3b-g, a two-sided log-rank test was used and no adjustments were made for multiple comparisons.

**a STRAC13 GES**

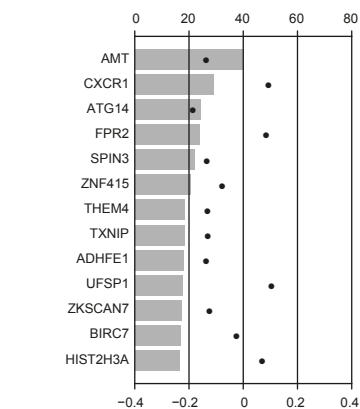

**b STRAC13 S-TRAC overall population**

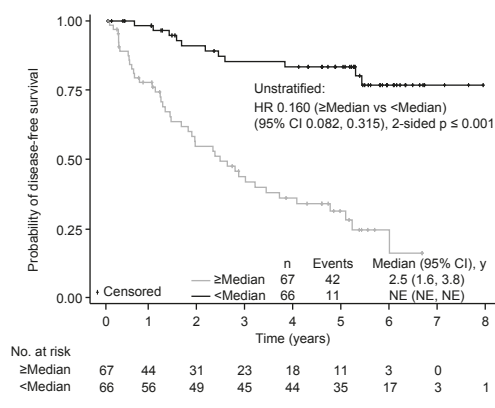

**c STRAC13 disease-free survival**

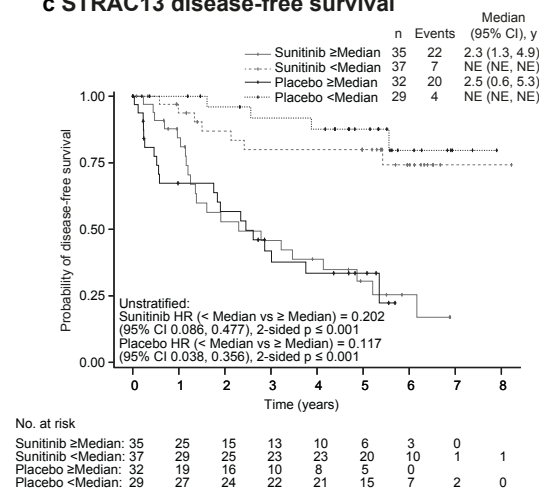

**d STRAC13 TCGA KIRC**

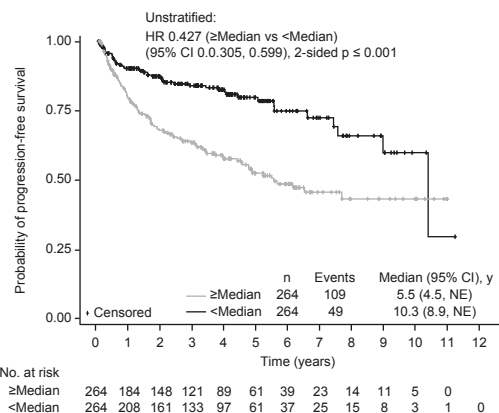

**e STRAC13 TCGA KIRC**

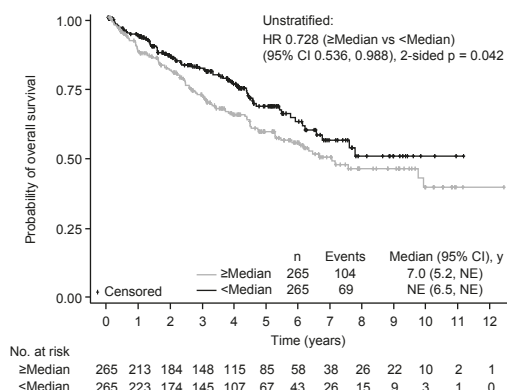

**f STRAC13 JAVELIN overall population**

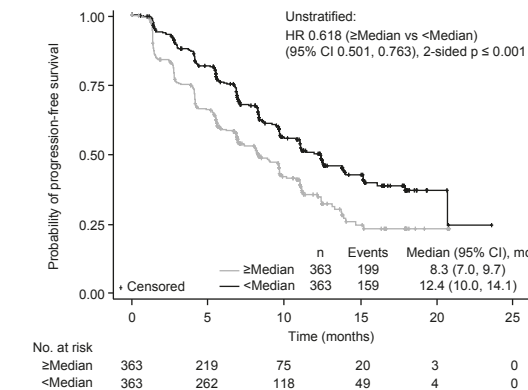

**g STRAC13 JAVELIN treatment cohorts**

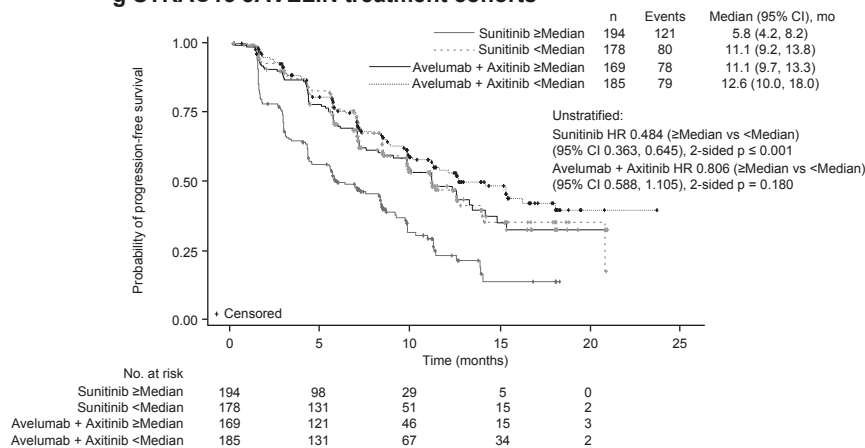

ADHFE1=alcohol dehydrogenase iron containing 1; AMT=aminomethyltransferase; ATG14=autophagy-related 14; BIRC7=baculoviral IAP repeat containing 7; CI=confidence interval; DFS=disease-free survival; CXCR1=C-X-C motif chemokine receptor 1; FPR2=formyl peptide receptor 2; GES=gene expression signature; HIST2H3A=histone cluster 2 H3A; HR=hazard ratio; NE=not estimable; OS=overall survival; PFS=progression-free survival; SPIN3=spindlin family member 3; STRAC13=gene expression signature of 13 genes; TCGA KIRC=The Cancer Genome Atlas Kidney Renal Clear Cell Carcinoma; THEM4=thioesterase
